# Supplementary material
Source: publisher figshare collection journal article supplement (https://aacr.figshare.com/articles/dataset/_/23814444)
Supplement: Supplementary file 1 [file 41783457]

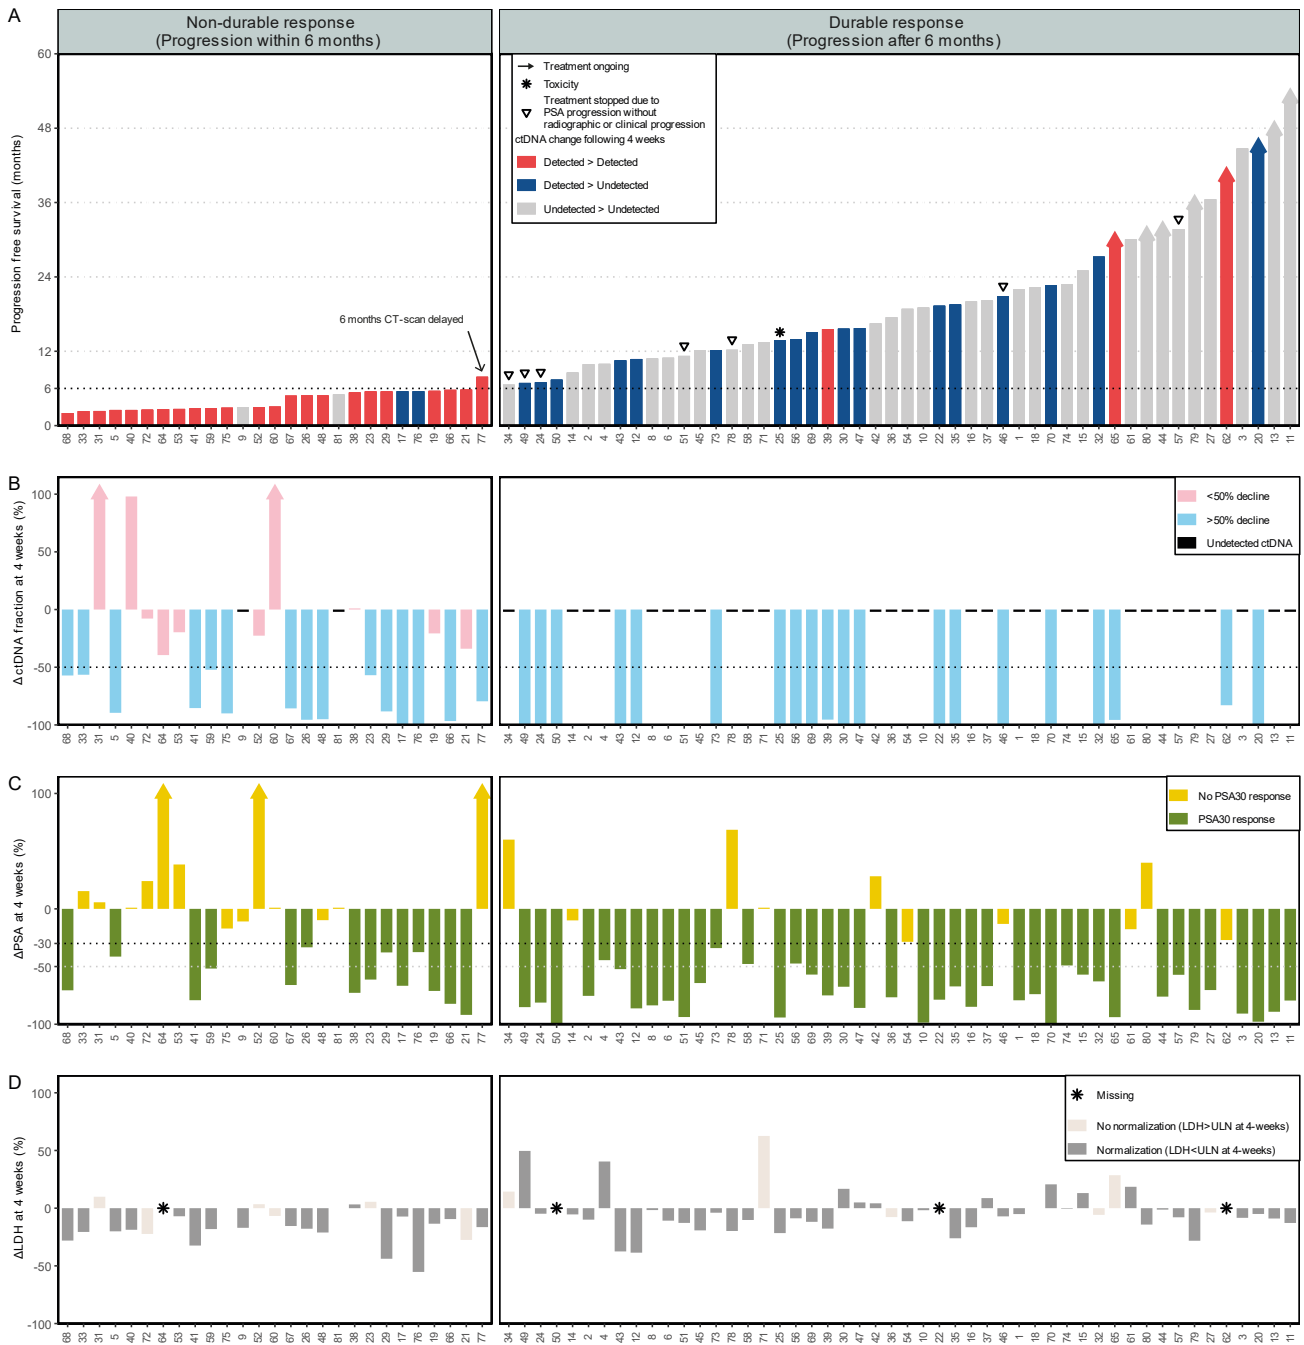

**Supplementary Figure S2: On-treatment ctDNA fraction, PSA and LDH changes and durability of treatment response. (A)** Swimmers plot showing per patient progression-free survival. Bar colors indicate the ctDNA conversion groups following 4 weeks of treatment. Arrows indicate patients still on treatment. **(B)** The change in ctDNA fraction following 4 weeks of treatment. Arrows indicate a ctDNA increase greater than 100%. Pink bars indicate patients who did not achieve a 50% decrease in ctDNA at 4 weeks. Patients with undetected ctDNA at baseline and 4-weeks were not evaluable. **(C)** The change in serum PSA following 4 weeks of treatment. Arrows indicate a PSA increase greater than 100%. Red bars indicate patients who did not achieve a PSA30 response at 4 weeks. **(D)** The change in LDH

following 4 weeks of treatment. Dark-gray bars indicate patients with LDH normalization (LDH remaining or reducing to normal levels after 4 weeks of treatment). Off-white bars indicate patients without LDH normalization (LDH above the upper limit of normal at 4 weeks of treatment). Stars are indicated when LDH measurements were missing at baseline and/or 4-weeks.
